# Supplementary material for: Tuning porous Li 6.25 Ga 0.25 La 3 Zr 2 O 12 (LGLZO) frameworks for enhanced ion transport in semi-solid-state lithium metal batteries
Source: Royal Society of Chemistry journal article supplement (doi:10.1039/d5ta07975f), 2026-01-01
Supplement: d5ta07975f1.pdf [file d5ta07975f1.pdf]

## Supplementary Information

### Tuning Porous $\text{Li}_{6.25}\text{Ga}_{0.25}\text{La}_3\text{Zr}_2\text{O}_{12}$ (LGLZO) Frameworks for

### Enhanced Ion Transport in Semi-Solid-State Lithium Metal Batteries

Ziyao Wang<sup>a</sup>, Sijia Huo <sup>a,\*</sup>, Meichen Pan<sup>a</sup>, Yihan Qiu <sup>a</sup>, Ying Tian <sup>a</sup>, Ying Zhou <sup>a</sup>,  
Wei Yan <sup>a</sup>, Xiaoming Duan <sup>a</sup>, Wen Wang <sup>a,\*</sup>, Yu Zhou <sup>a</sup>

<sup>a</sup> Harbin Institute of Technology, School of Materials Science and Engineering,  
Harbin 150001, China

\* Corresponding author.

E-mail: [wangwen@hit.edu.cn](mailto:wangwen@hit.edu.cn)(W. Wang) and [huosijia@hit.edu.cn](mailto:huosijia@hit.edu.cn) (S. Huo)

Porosity

Randomly generated two-dimensional pore images

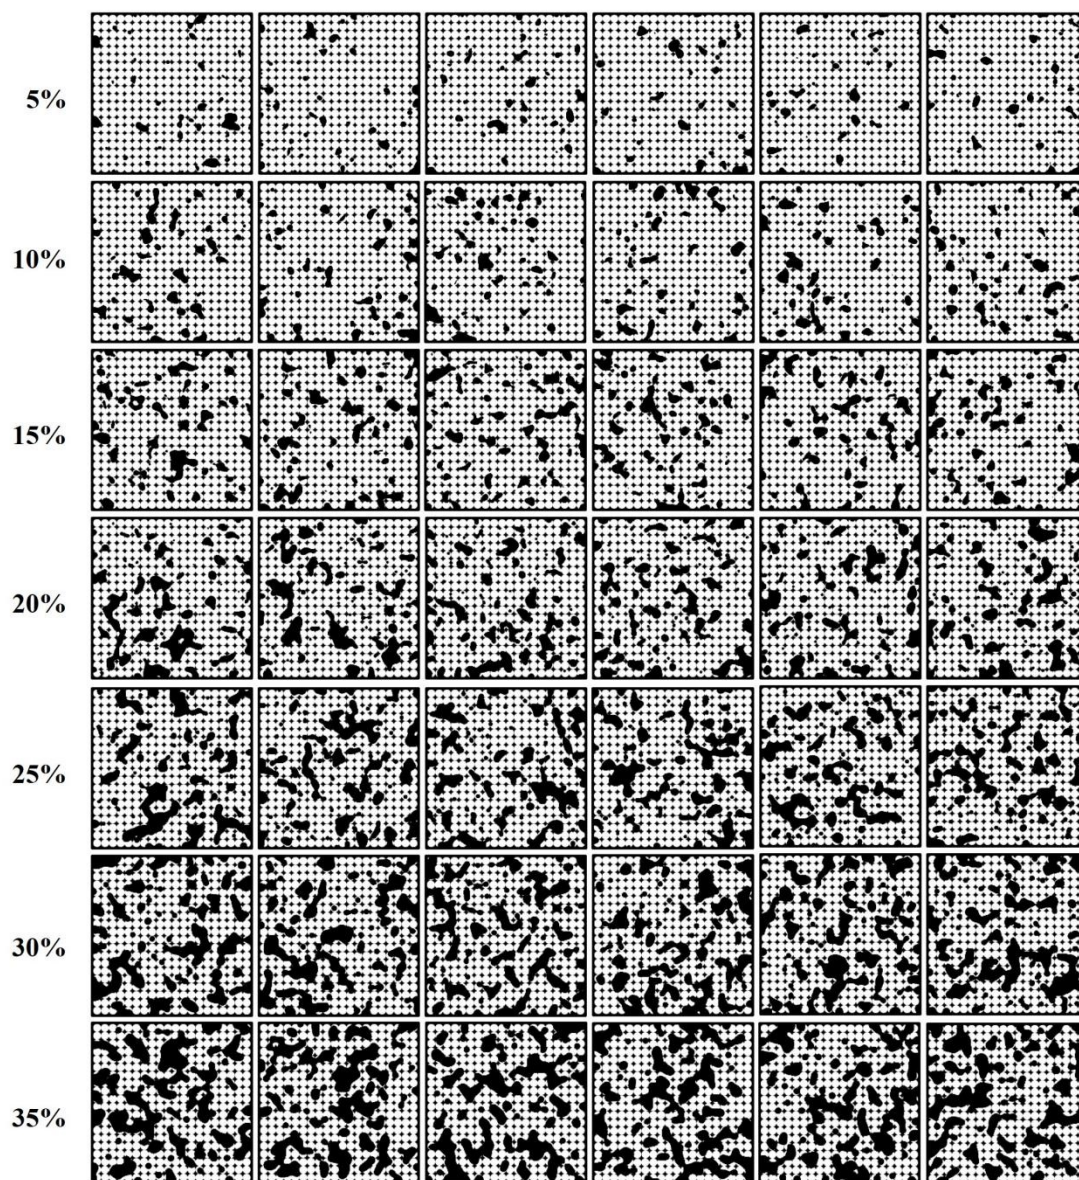

**Figure S1.** Randomly generated two-dimensional pore structures with porosity ranging from 5% to 35%, where the black regions represent pores and the white regions correspond to the LGLZO framework.



Porosity

Randomly generated two-dimensional pore images

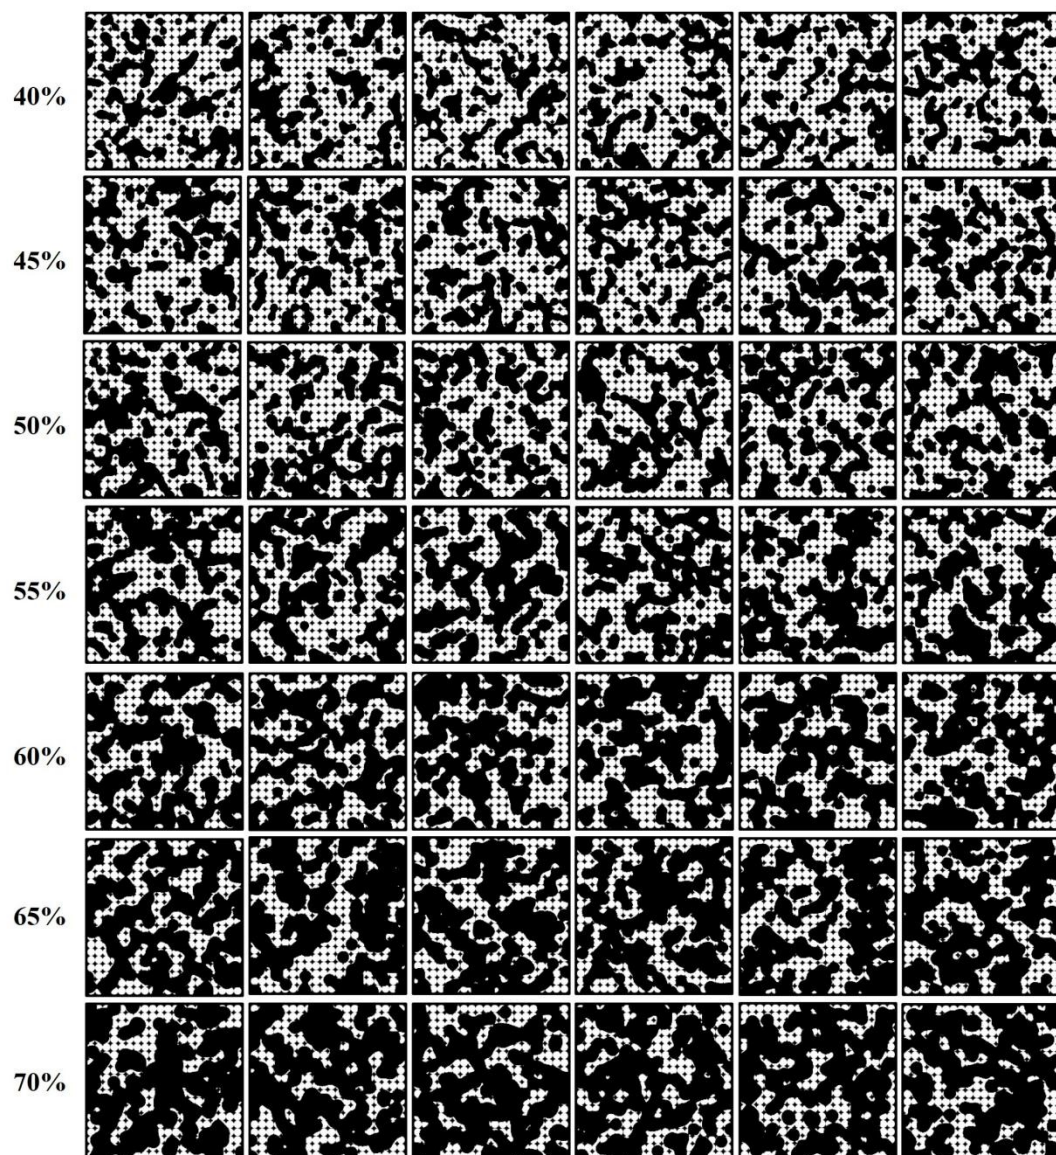

**Figure S1.** Randomly generated two-dimensional pore structures with porosity ranging from 40% to 70%, where the black regions represent pores and the white regions correspond to the LGLZO framework.

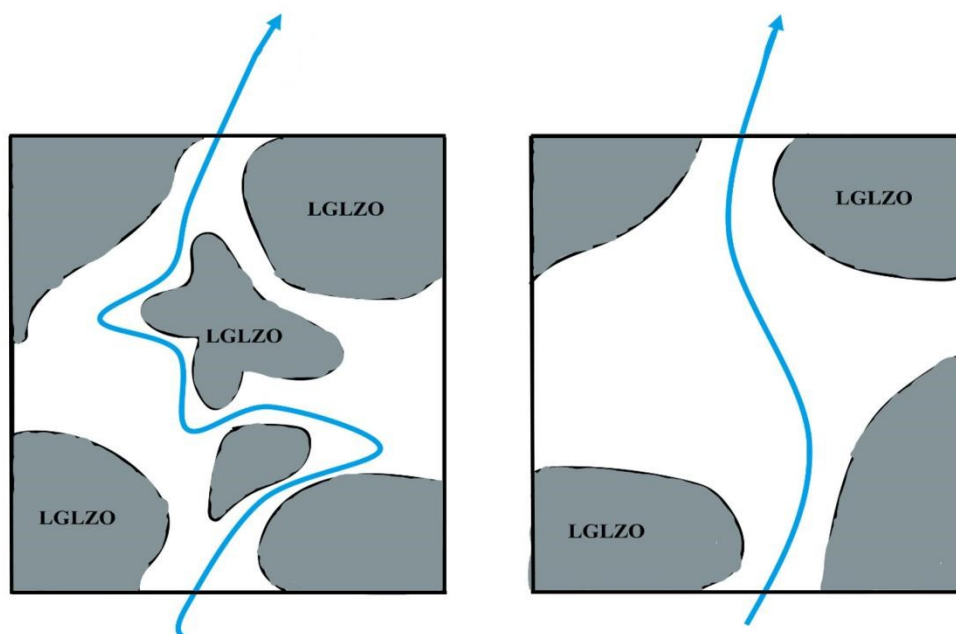

**Figure S2.** Schematic illustration of lithium-ion migration in different pore structures.

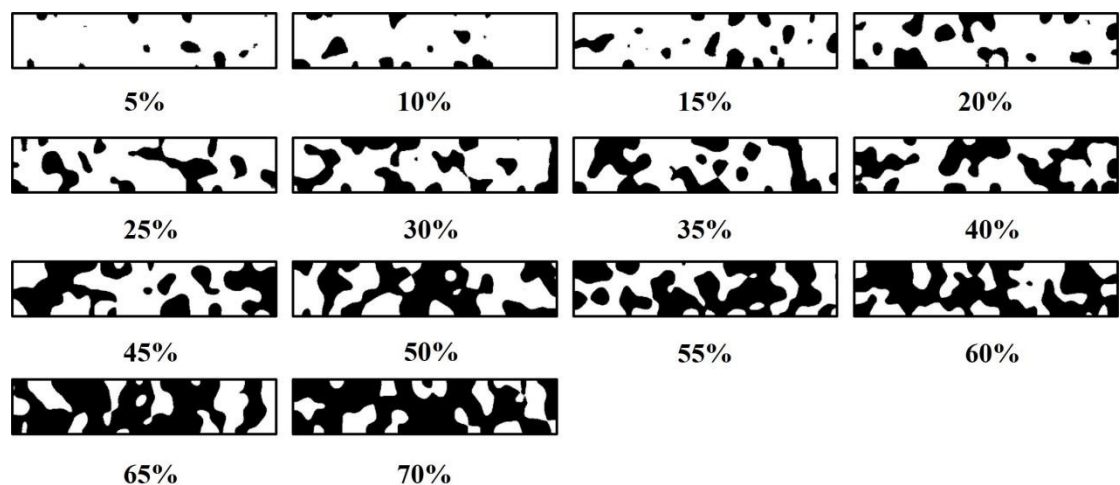

**Figure S3.** Two-dimensional images (100 dpi  $\times$  500 dpi) of porous structures with porosity ranging from 5% to 70%.

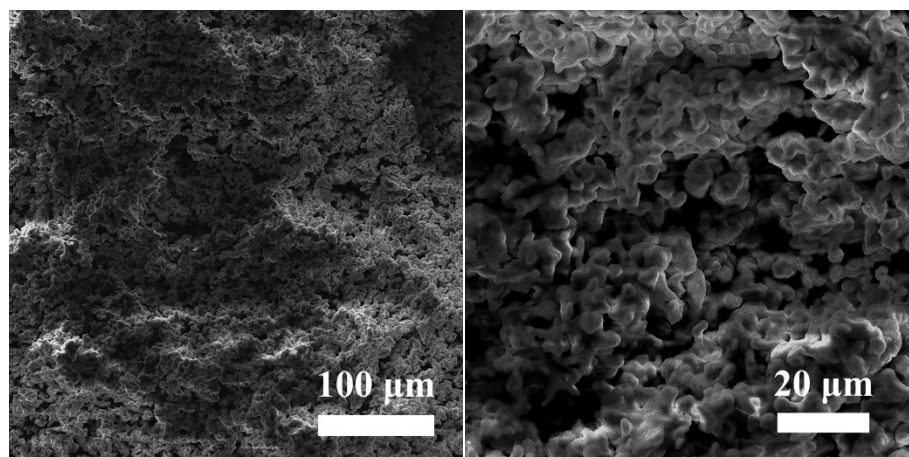

**Figure S4.** LGLZO green body after calcination for carbon removal and before sintering.

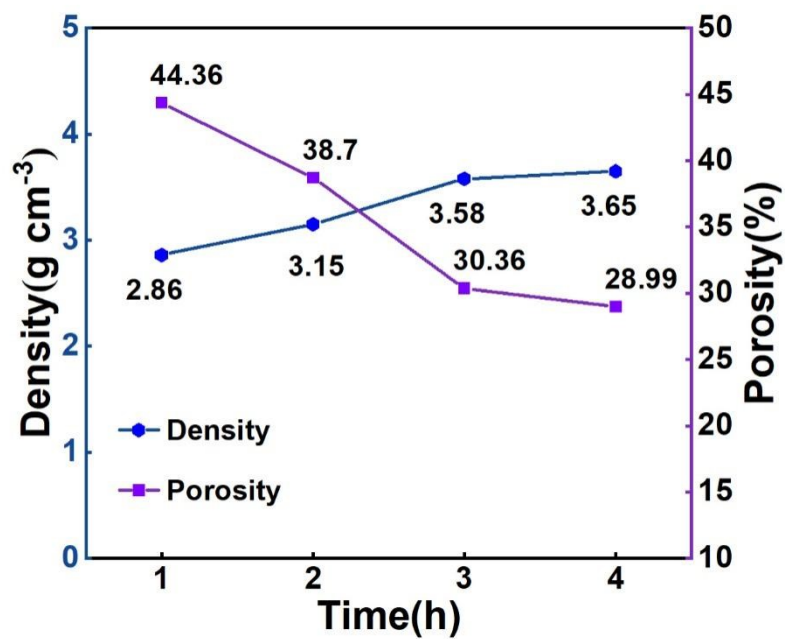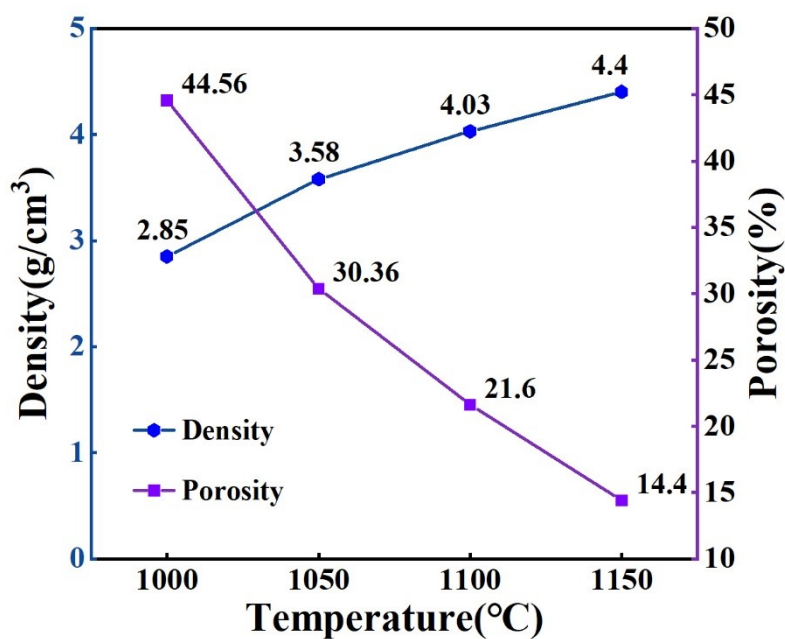

**Figure S5.** Variation of framework density and porosity with sintering time and temperature.

The density was calculated from pellets with a diameter of 10 mm based on mass and volume, while subsequent porosity measurements were performed using pellets with a diameter of 18 mm.

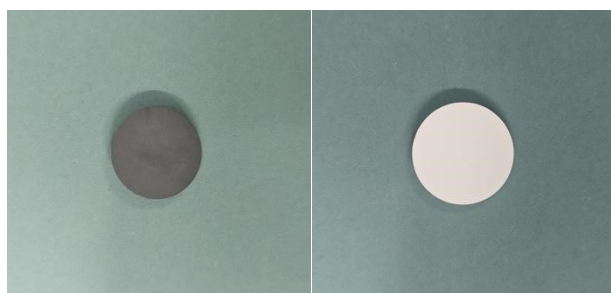

**Figure S6.** Optical photographs of ceramic bodies.



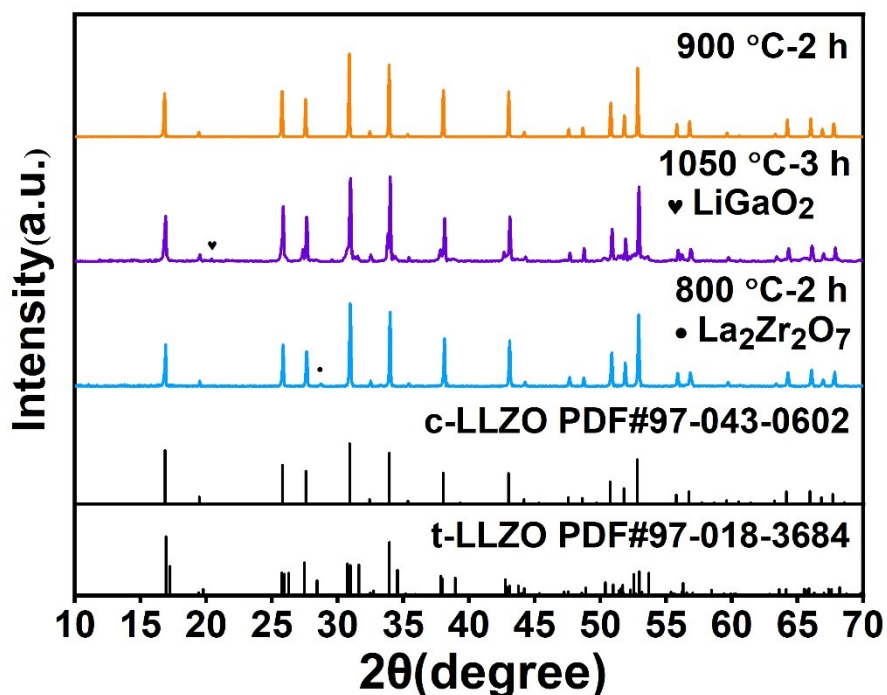

**Figure S7.** Phase evolution of the framework during the preparation process.

During the high-temperature sintering process of LLZO ceramics, significant volatilization of lithium results in a decrease in lithium-ion concentration within the lattice. This leads to the formation of enriched  $\text{Li}_2\text{O}$  liquid phases at grain boundaries. Upon cooling, these liquid phases react with the doped  $\text{Ga}_2\text{O}_3$  to form  $\text{LiGaO}_2$ . Concurrently, if the precursor reaction is incomplete,  $\text{La}_2\text{Zr}_2\text{O}_7$  phases may remain. The presence of these secondary phases severely impedes lithium-ion transport: the discontinuous distribution of  $\text{LiGaO}_2$  disrupts the continuity of grain boundary conduction, while the non-lithium-ion-conducting  $\text{La}_2\text{Zr}_2\text{O}_7$  directly blocks transport pathways. Collectively, these effects increase grain boundary impedance and reduce overall ionic conductivity. However, subsequent heat treatment eliminates these metastable secondary phases.  $\text{LiGaO}_2$  decomposes to provide a lithium source, while  $\text{La}_2\text{Zr}_2\text{O}_7$  reacts with this lithium source and reintegrates into the lattice, ultimately transforming into pure cubic LLZO.

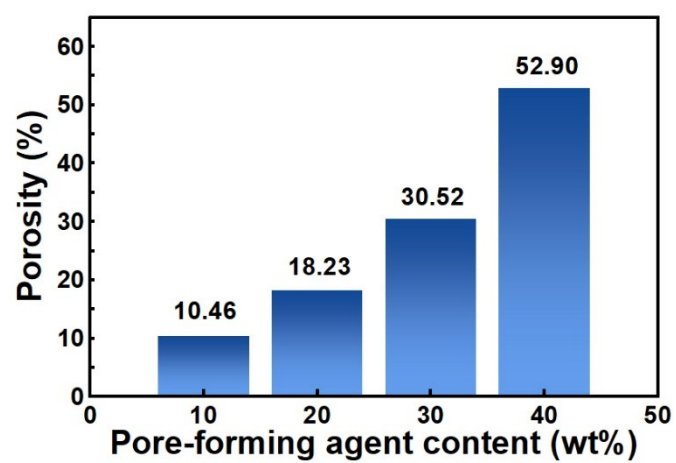

**Figure S8.** Variation of porosity with pore-forming agent content.

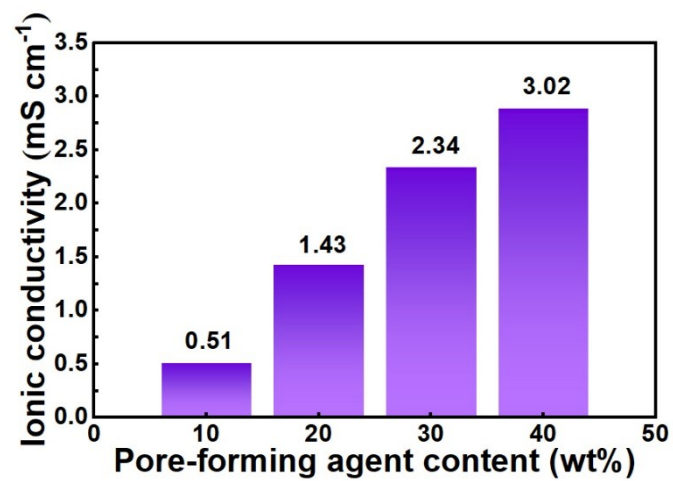

**Figure S9.** Variation of ionic conductivity with pore-forming agent content.

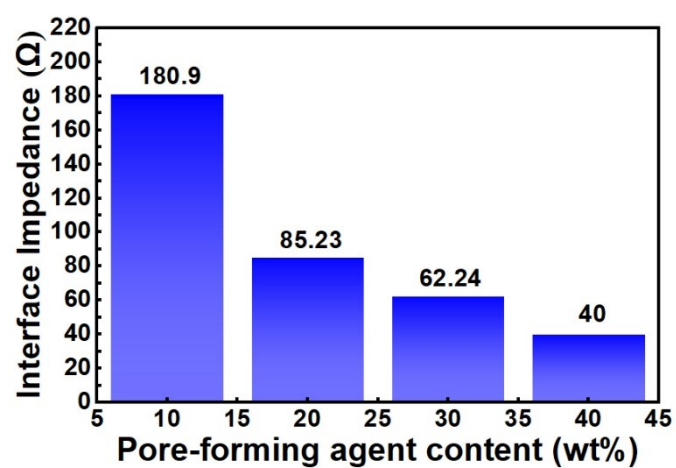

**Figure S10.** Variation of interfacial impedance with pore-forming agent content.

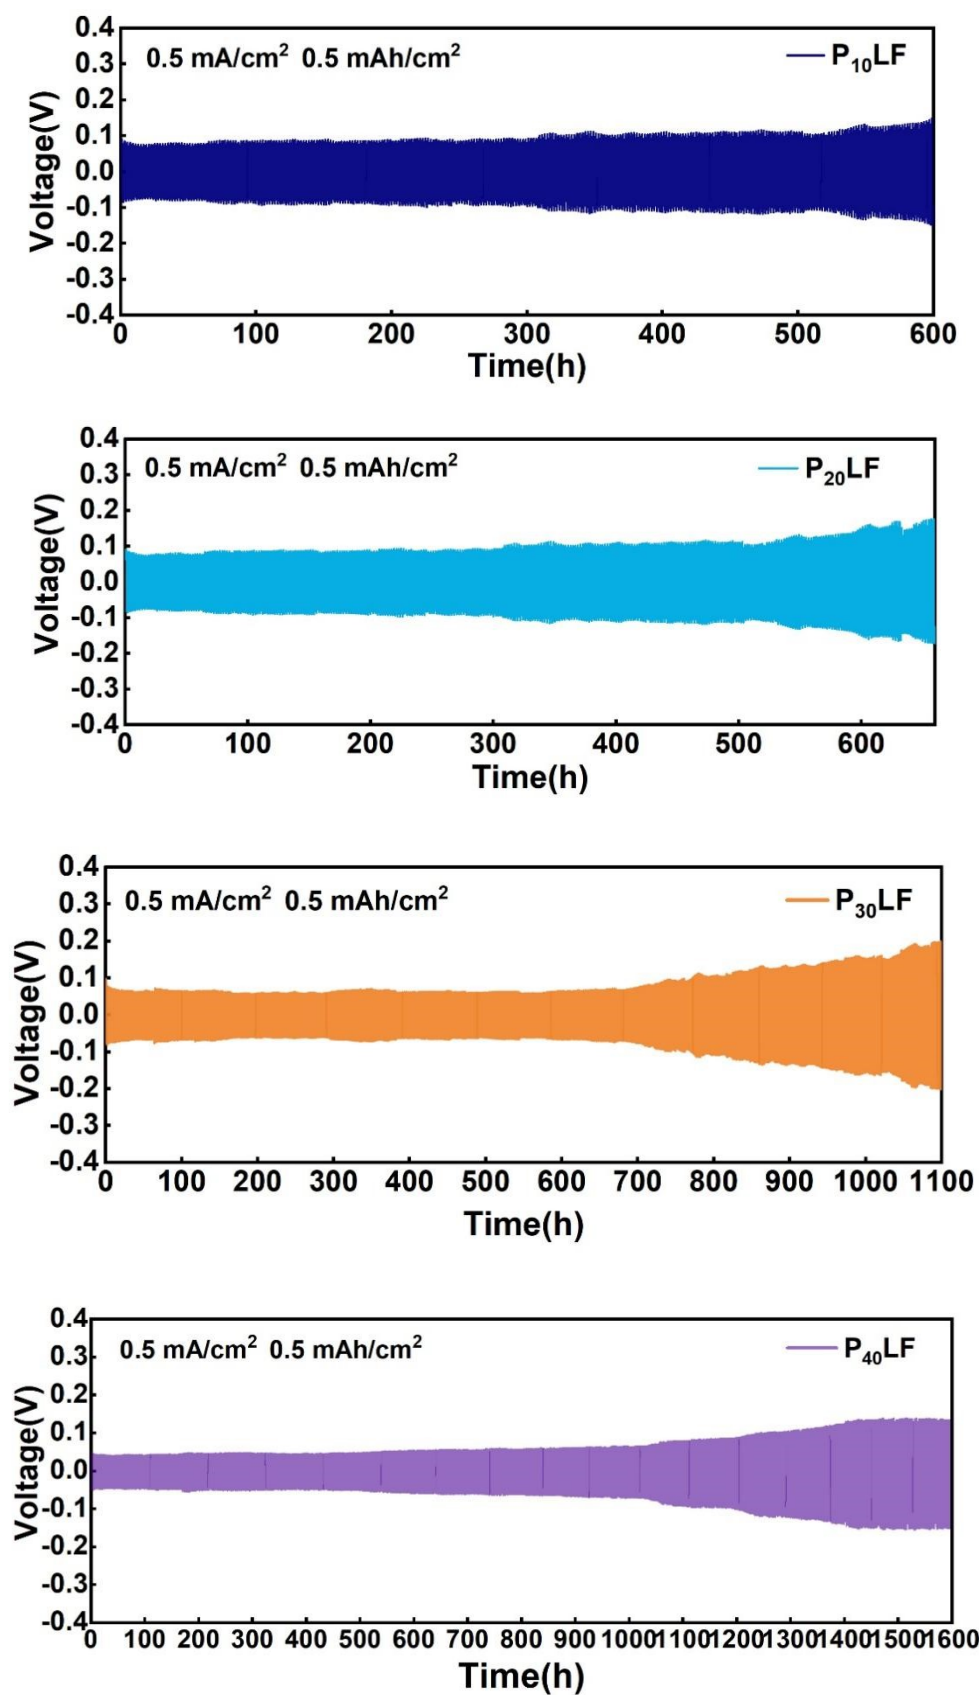

**Figure S11.** Long-term cycling performance of Li/PLF-LiPF<sub>6</sub>/Li cells at 25 °C under a current density of 0.5 mA cm<sup>-2</sup>.



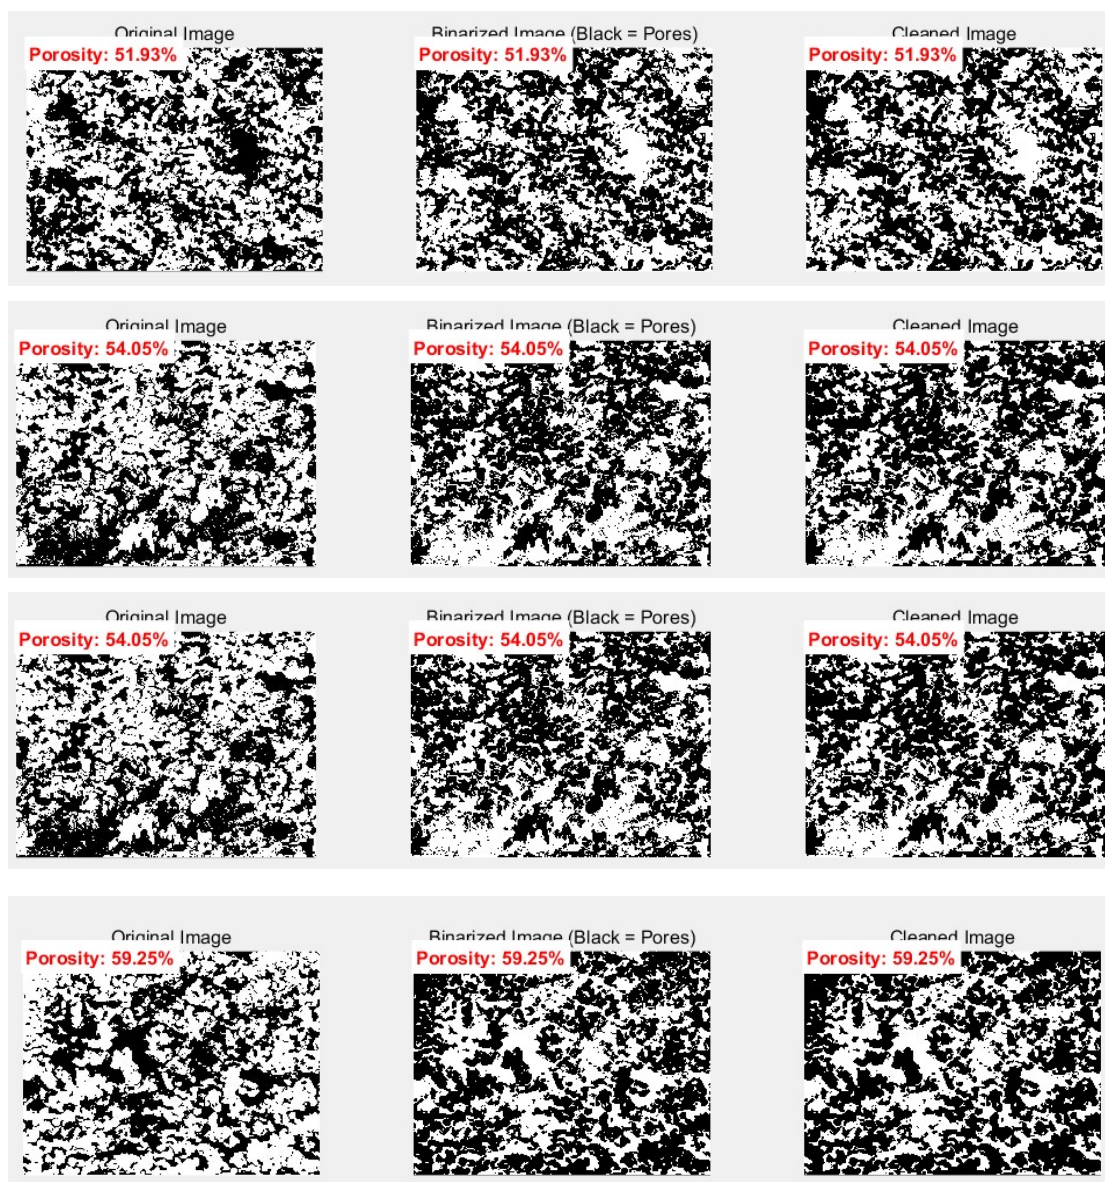

**Figure S12.** Pore analysis of SEM-imaged specimens

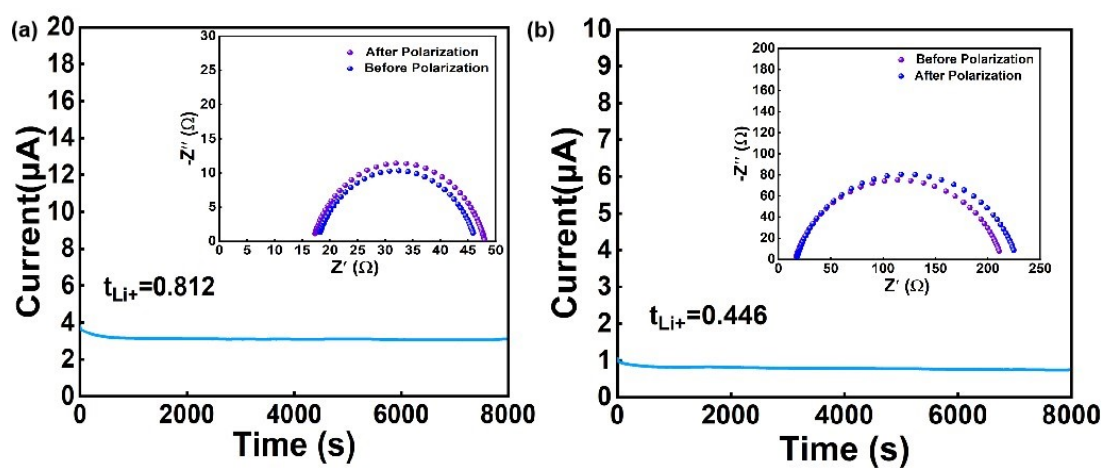

**Figure S13.** Comparison of lithium ion mobility between Li/ P<sub>G</sub>LF-LiPF<sub>6</sub>/Li and Li/ SiO<sub>2</sub> -LiPF<sub>6</sub>/Li symmetric cells.

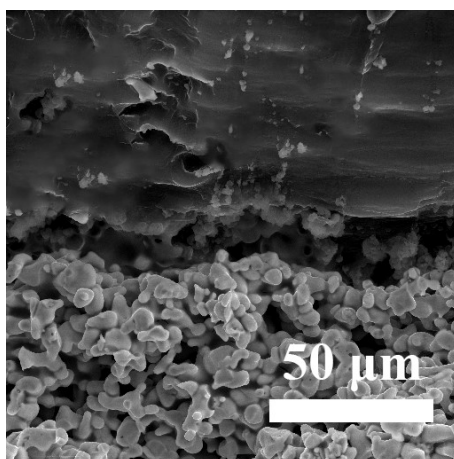

**Figure S14.** SEM image of the anode–framework interface after 100 cycles at 1 C.

The battery was disassembled after 100 cycles at 1 C, followed by vacuum drying at 40 °C for 24 h, and the electrode–electrolyte interface was then examined using SEM.

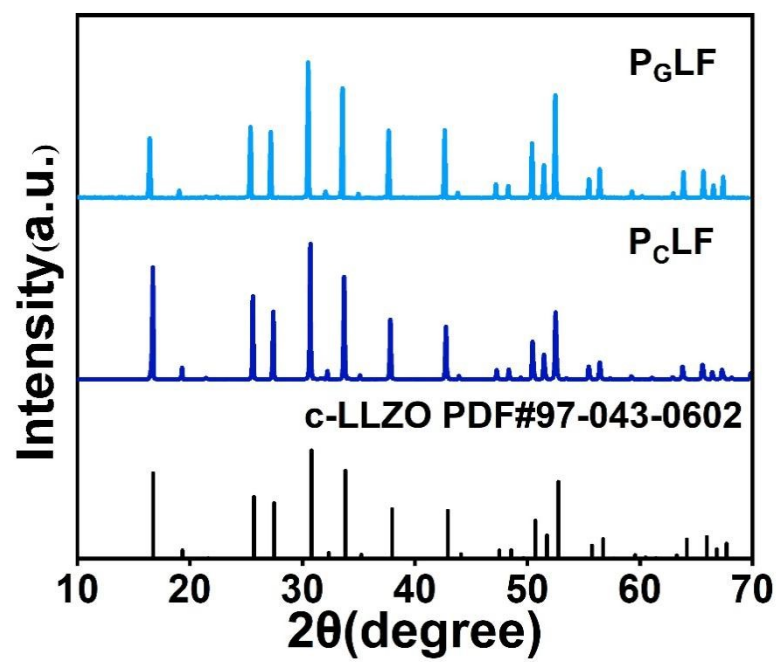

**Figure S15.** Phase structures of  $P_GLF$  and  $P_CLF$ .

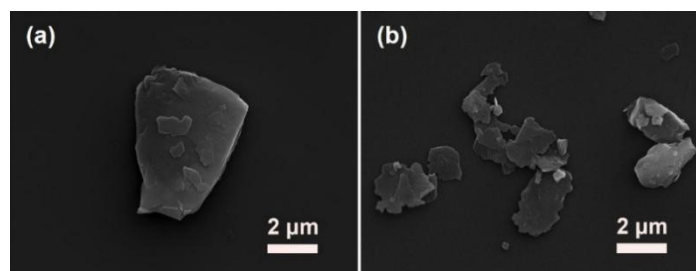

**Figure S16.** (a) Graphite and (b) Charcoal Microstructure



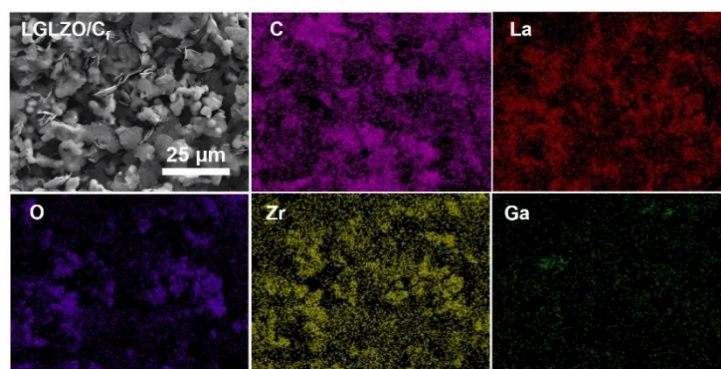

**Figure S17.** EDS of LGLZO/C<sub>f</sub> composite powder

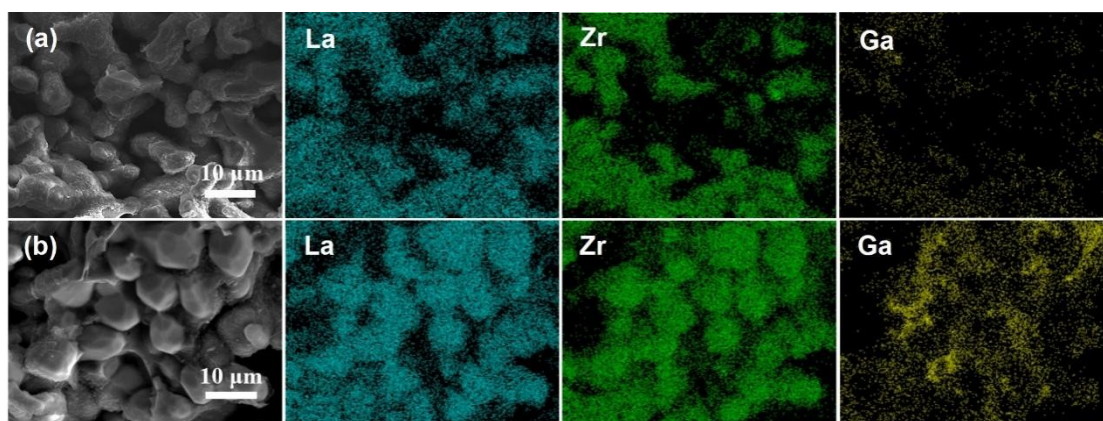

**Figure S18.** SEM images and EDS spectra of (a) P<sub>G</sub>LF and (b) P<sub>C</sub>LF.

**Table S1.** Porosity in Quasi-Solid Electrolyte article

| Title                                                                                                                                                                                                        | Porosity | Ref. |
|--------------------------------------------------------------------------------------------------------------------------------------------------------------------------------------------------------------|----------|------|
| Garnet-Based Solid-State Li Batteries with High-Surface-Area Porous LLZO Membranes (ACS Applied Materials & Interfaces, 2024).                                                                               | 51%      | [S1] |
| Oriented porous LLZO 3D structures obtained by freeze casting for battery applications (Journal of Materials Chemistry A, 2019)                                                                              | 60%      | [S2] |
| Uniformly porous PVDF-co-HFP membranes prepared by mixed solvent phase separation for direct contact membrane distillation (Journal of Membrane Science, 2024)                                               | 86%      | [S3] |
| Self-adaptable gel polymer electrolytes enable high-performance and all-round safety lithium ion batteries (Energy Storage Materials, 2022)                                                                  | 78%      | [S4] |
| Poly(vinylidene fluoride)/SiO <sub>2</sub> composite membranes prepared by electrospinning and their excellent properties for nonwoven separators for lithium-ion batteries (Journal of Power Sources, 2014) | 75%      | [S5] |

**Table S2.** Changes in the Quality with Different Carbon Content

| Content of<br>perforating<br>agent | Organization | Before calcination | After calcination | Variation in<br>Mass Before<br>and After |
|------------------------------------|--------------|--------------------|-------------------|------------------------------------------|
| 10 %                               | Quality (g)  | 1.0942             | 0.9615            | -11.13 %                                 |
| 20 %                               | Quality (g)  | 1.2244             | 0.9545            | -22.04 %                                 |
| 30 %                               | Quality (g)  | 1.1303             | 0.7700            | -31.87 %                                 |
| 40 %                               | Quality (g)  | 1.0392             | 0.6306            | -39.32 %                                 |

**Table S3.** Comparison of ionic conductivity, current density, and cycling stability of this work with previously reported electrolytes.

| Electrolyte                   | Ionic conductivity<br>( $\times 10^{-3}$ S cm $^{-1}$ ) | Current density<br>(mA cm $^{-2}$ ) | Cycle Time<br>(h) | Ref.  |
|-------------------------------|---------------------------------------------------------|-------------------------------------|-------------------|-------|
| PEO/LLZO                      | 1.36                                                    | 0.2                                 | 400               | [S6]  |
| PEO/LLZO framework            | 0.14                                                    | 0.2                                 | 400               | [S7]  |
| LE/LLZO framework             | 4.2                                                     | 0.5                                 | 1400              | [S8]  |
| PEO/LLZO nanowires            | 1.53                                                    | 0.5                                 | 1050              | [S9]  |
| PVDF/LLZTO                    | 0.12                                                    | 0.1                                 | 1200              | [S10] |
| PEO/LICGC                     | 0.29                                                    | 0.2                                 | 800               | [S11] |
| PEO/Li $_2$ ZrO $_3$          | 0.5                                                     | 0.1                                 | 200               | [S12] |
| LE/FEC/LLZTO                  | 0.65                                                    | 0.1                                 | 500               | [S13] |
| PVDF/TiO $_2$                 | 0.33                                                    | 0.2                                 | 3800              | [S14] |
| LE/MOFs                       | 0.24                                                    | 0.5                                 | 1000              | [S15] |
| LE/MOFs                       | 7.74                                                    | 0.2                                 | 1000              | [S16] |
| LE/LATP framework             | 7.9                                                     | 1                                   | 120               | [S17] |
| PEO/LLZTO                     | 0.22                                                    | 0.1                                 | 2500              | [S18] |
| PEO/LLZO                      | 0.18                                                    | 0.5                                 | 200               | [S19] |
| PEO/LLZO                      | 0.64                                                    | 0.2                                 | 600               | [S20] |
| PEO/Bi $_4$ Ti $_3$ O $_{12}$ | 0.62                                                    | 0.1                                 | 3000              | [S21] |
| LE/ODA nanofiber              | 2.9                                                     | 1                                   | 2000              | [S22] |
| LE/PIM-CONH $_2$              | 1.08                                                    | 0.1                                 | 1500              | [S23] |
| LE/LLZO framework             | 2.06                                                    | 0.5                                 | 800               | [S24] |
| LE/LLZO-TiO $_2$              | 1.6                                                     | 0.3                                 | 500               | [S25] |



|                    |      |     |      |           |
|--------------------|------|-----|------|-----------|
| LE/LGLZO framework | 2.54 | 0.5 | 1150 | This work |
| LE/LGLZO framework | 3.02 | 0.5 | 1600 | This work |

---

## Reference

- [S1] Zhang, H., Okur, F., Pant, B., Klimpel, M., et al. Garnet-based solid-state Li batteries with high-surface-area porous LLZO membranes. *ACS Applied Materials & Interfaces*, 2024, 16(10), 12353-12362.
- [S2] Shen H, Yi E, Amores M, et al. Oriented porous LLZO 3D structures obtained by freeze casting for battery applications[J]. *Journal of materials chemistry A*, 2019, 7(36): 20861-20870.
- [S3] Al Nuaimi, R., Thankamony, R. L., et al. Uniformly porous PVDF-co-HFP membranes prepared by mixed solvent phase separation for direct contact membrane distillation. *Journal of Membrane Science*, 2024, 711, 123175.
- [S4] Long, M. C., Wu, G., Wang, X. L., et al. Self-adaptable gel polymer electrolytes enable high-performance and all-round safety lithium ion batteries. *Energy Storage Materials*, 2022, 53, 62-71.
- [S5] Zhang F, Ma X, Cao C, et al. Poly (vinylidene fluoride)/SiO<sub>2</sub> composite membranes prepared by electrospinning and their excellent properties for nonwoven separators for lithium-ion batteries[J]. *Journal of Power Sources*, 2014, 251: 423-431.
- [S6] Yin J, Xu X, Jiang S, et al. High ionic conductivity PEO-based electrolyte with 3D framework for Dendrite-free solid-state lithium metal batteries at ambient temperature[J]. *Chemical Engineering Journal*, 2022, 431: 133352.
- [S7] Zhang H, An X, Lu Z, et al. A three dimensional interconnected Li<sub>7</sub>La<sub>3</sub>Zr<sub>2</sub>O<sub>12</sub> framework composite solid electrolyte utilizing lignosulfonate/cellulose nanofiber bio-template for high performance lithium ion batteries[J]. *Journal of Power Sources*, 2020, 477: 228752.
- [S8] Wang Z, Chen L, Niu C, et al. Synthesis of Quasi-Solid Electrolytes from High-Strength and Highly Oriented LLZO Porous Ceramics[J]. *ACS Applied Energy Materials*, 2024, 7(21): 9670-9675.
- [S9] Wan Z, Lei D, Yang W, et al. Low resistance – integrated all - solid - state battery achieved by Li<sub>7</sub>La<sub>3</sub>Zr<sub>2</sub>O<sub>12</sub> nanowire upgrading polyethylene oxide (PEO)

- composite electrolyte and PEO cathode binder[J]. *Advanced Functional Materials*, 2019, 29(1): 1805301.
- [S10] Ma X, Mao D, Xin W, et al. Flexible Composite Electrolyte Membranes with Fast Ion Transport Channels for Solid-State Lithium Batteries[J]. *Polymers*, 2024, 16(5): 565.
- [S11] Sahore R, Armstrong B L, Tang X, et al. Role of Scaffold Architecture and Excess Surface Polymer Layers in a 3D - Interconnected Ceramic/Polymer Composite Electrolyte[J]. *Advanced Energy Materials*, 2023, 13(19): 2203663.
- [S12] Yang L, Zhang H, Xia E, et al. PEO/Li<sub>2</sub>ZrO<sub>3</sub> composite electrolyte for solid-state rechargeable lithium battery[J]. *Journal of Energy Storage*, 2023, 65: 107283.
- [S13] Cai D, Zhang J, Li F, et al. LLZTO Nanoparticle-and Cellulose Mesh-Coreinforced Flexible Composite Electrolyte for Stable Li Metal Batteries[J]. *ACS Applied Materials & Interfaces*, 2023, 15(31): 37884-37892.
- [S14] Chen S, Guo J, Zang H, et al. Oxygen vacancy-enriched TiO<sub>2</sub> nanosheets filled PVDF electrolyte for semi-solid-state batteries: Synergistic effects of conformational transition and defect sites[J]. *Journal of Alloys and Compounds*, 2025, 1020: 179357.
- [S15] Nguyen M H, Ngo N M, Kim B K, et al. Dual Ionic Pathways in Semi - Solid Electrolyte based on Binary Metal - Organic Frameworks Enable Stable Operation of Li - Metal Batteries at Extremely High Temperatures[J]. *Advanced Science*, 2024, 11(43): 2407018.
- [S16] Tao F, Wang X, Jin S, et al. A composite of hierarchical porous MOFs and halloysite nanotubes as single - ion - conducting electrolyte toward high - performance solid - state lithium - ion batteries[J]. *Advanced Materials*, 2023, 35(29): 2300687.
- [S17] Reinoso D M, de la Torre-Gamarra C, Fernández-Ropero A J, et al. Advancements in quasi-solid-state Li batteries: a rigid hybrid electrolyte using

- LATP porous ceramic membrane and infiltrated ionic liquid[J]. ACS Applied Energy Materials, 2024, 7(4): 1527-1538.
- [S18] Li X, Liu S, Shi J, et al. High performance porous poly (ethylene oxide)-based composite solid electrolytes[J]. Chemical Engineering Journal, 2023, 468: 143795.
- [S19] Hu W, Chien P H, Wu N, et al. High Li<sup>+</sup> Conducting Porous Garnet Enables Fast Li<sup>+</sup> Conduction in Polymer/Garnet Composite Electrolyte[J]. ACS Applied Energy Materials, 2024, 7(18): 8077-8084.
- [S20] Xie Y, Huang L, Chen Y. A porous garnet Li<sub>7</sub>La<sub>3</sub>Zr<sub>2</sub>O<sub>12</sub> scaffold with interfacial modification for enhancing ionic conductivity in PEO-based composite electrolyte[J]. Journal of Membrane Science, 2023, 683: 121784.
- [S21] Kang J, Yan Z, Gao L, et al. Improved ionic conductivity and enhanced interfacial stability of solid polymer electrolytes with porous ferroelectric ceramic nanofibers[J]. Energy Storage Materials, 2022, 53: 192-203.
- [S22] Huang Y, Liu S, Chen Q, et al. Constructing highly conductive and thermomechanical stable quasi - solid electrolytes by self - polymerization of liquid electrolytes within porous polyimide nanofiber films[J]. Advanced Functional Materials, 2022, 32(31): 2201496.
- [S23] Lu S, He K, Zhou L, et al. The Regulation of Ion Transport Microenvironment in Micropores to Precisely Construct Porous Polymer Electrolytes for Solid-State Lithium–Metal Batteries[J]. ACS nano, 2025.
- [S24] Zhou Y, Tian Y, Wang W, et al. Porous Ga<sub>0.25</sub>Li<sub>6.25</sub>La<sub>3</sub>Zr<sub>2</sub>O<sub>12</sub> frameworks by gelcasting–reaction sintering for high-performance hybrid quasi-solid lithium metal batteries[J]. Journal of Materials Chemistry A, 2023, 11(44): 23932-23939
- [S25] Luo P, Zeng B, Li W, et al. TiO<sub>2</sub> - Induced Conversion Reaction Eliminating Li<sub>2</sub>CO<sub>3</sub> and Pores/Voids Inside Garnet Electrolyte for Lithium – Metal Batteries[J]. Advanced Functional Materials, 2023, 33(35): 2302299.
